# Supplementary material for: Patient needs and preferences for herb-drug-disease interaction alerts: a structured interview study
Source: BMC Complement Altern Med. 2017 May 19;17:272. doi: 10.1186/s12906-017-1630-6 (PMC5438528; doi:10.1186/s12906-017-1630-6)
Supplement: Supplementary file 2 — Patient Questionnaire. (XLSX 31 kb) [file 12906_2017_1630_MOESM2_ESM.xlsx]

## Sheet: Sheet1
Participant ID	Gender	Age	Ethnicity	Race	Education	Language		1. Have you ever used or do you currently use supplements or alternative medicine, such as: vitamins, minerals, herbs, plants, or other natural products, amino acids or over-the-counter medication? a. Yes; if so, what? / b. No	Supplements, etc. used by participants	2. Have you ever told your doctor or health care provider about your use of, supplements or alternative medicine?	Why or why not?	3. If yes, when did you tell your doctor or health care provider about your supplements or alternative medicine use? For example (circle all that apply). a. When you started taking them; b. When you stopped taking them; c. When you suspected a problem; d. When you filled out your history at a doctor visit; e. Other	Other	4. Have any doctors or other health care providers ever asked you about your use of supplements or alternative medicine? If yes, please provide examples of when this occurred? a. Yes; b. No	Examples	5. If you are asked about your supplements or alternative medicine use, do you tell your doctor or health care provider?	6. If you do inform your doctor or health care provider, do you feel the information is taken into account with regard to your treatment or management of your illness?	7. Would you be interested in receiving information about potential interactions with your prescriptions and other medications, including supplements and alternative medicine? a. Yes, why? b. No, why not?	Why or why not?	8. If we send you information alerting you about potential interactions, when and how would you like to receive this information? (circle all that apply) a. Directly from your doctor; b. At a kiosk in the waiting room at doctor visits; c. With a smart phone application; d. Through your personal health record (PHR); e. At the pharmacy; f. By print or email; g. Other, please explain	Other, please explain	9. Some interactions are severe, while others are less severe. Do you want to be told about ALL possible interactions, or just the more serious interactions? Some interactions may be life threatening, for example, while other interactions may be less severe though occurring with greater frequency. Please select a. or b. below and tell us about your preferences. a. ALL possible interactions. Pleas…	Preferences	10. What information would you like to receive regarding the possible drug interaction? For example, if you were taking St. John’s wort with warfarin (a blood thinner) which of the information below would you like to receive? (circle all that apply). *	11. Please describe your reasons for selecting your responses to the previous question.
1	F	40-49	Non-Hispanic	White	12th grade	English		a.	Ibuprofen, feverroot (for migraines), aspirin, NyQuil, Excedrin, St. Johns wort, MV1, Calcium Vit D	a.	They asked.	d., e.	e. Told them.	b.	n/a	Yes	Yes	a.	I don't want to get sicker than I already am. A lot can interact & kill you; alternative & otherwise.	a., b., c., d., e., f.	n/a	a.	You many not die but you can (get) sick - you won't know which medicines are responsible & stop taking all meds & that can make you sick too.	a, b, c, d, e, f	a. Avoids complications b. Avoids complications c. No comment d. Being educated of all Medicines e. No comment f. No comment g. Because you need to be keeping up with new medicines - want to be educated. Want to know long-term effects.
2	F	40-49	Non-Hispanic	American Indian/Alaska Native	Above 12th	Russian		a.	Herbs, vitamins: ginger root, green tea, vitamins for colds. All organic foods, nothing processed.	b.	They don't ask. If they asked, I would tell them.	n/a	n/a	a.	Rarely they asked if she took supplements buy she rarely goest to the doctor.	Yes	No. She feels they do not prescribe medications because she does not take Rx drugs, but they do not consider the supplements.	a.	To see what it does.	a, b, c, d, f	n/a	a.	To see which ones are severe and which are not severe.	a., b., c., d., e., f., g.	a. To make sure there's no dangerous circumstances. She would not want to risk her life b. She would want to know all the information c. Because the MD says it's not good to take it. She would not want to experiment d. So she does not get the bleeding e. She does not want to get any strokes f. "So my blood flows normal" g. "The reason why they had strokes - more details"
3	M	30-39	Non-Hispanic	White	Above 12th	English		a.	Bio-35 vitamin	a.	Knows it's important	d.	n/a	b.	n/a	Yes	Yes	a.	Yes - interested in how potential [factors] may affect me.	e.	n/a	b.	Would like to also know about more common serious interactions.	a., b., c., d., e., f	More information better than less. Not interested in what's happened to others. That's why (G) was not circled. Health care is the individual's responsibility as much as the doctor's.
4	M	40-49	Non-Hispanic	White	Above 12th	English		a.	calcium/vitamin D, dandelion root, sawgrass (horsetail), silver pearl, jasmine teas (homemade teas), silver pearl tea as well.	a.	The doctor asks and he tells him sometimes he'll have a glass of herbal tea. Doctor says to be careful to not make it too strong- strong enough to have adverse effects.	d.	n/a	a.	Yesterday, told the doctor during intake.	Yes	Yes	a.	The more information the better. If you don't know about the potentials you could be increasing/decreasing the potency and interactions.	a., b., d., e., f., g.	g. Would like to see a compliation. Also, a medical guide/compilation. Also a software program where you can enter your info. in a personal computer. Also website.	a.	Concerned about interactions that lessen or increase the potency of the given dosage. That is, if I'm on xmg of an antidepressant, maybe the herbal medication will decrease the effectiveness. For example, energy drink + caffeine + ginseng = heart burst	a., b., c., d., e., f., g.	Important to know about all possible effects. Had radiation therapy and has several doctors. Would like to see communication between all his doctors. Plus, he has certain allergies. The pharmacy can be helpful, but if they don't know what all you're taking then they can't inform. So it would be good to have a personal computer application to be able to have control over punching in his own medica…
5	F	30-39	Non-Hispanic	White	12th grade	English		a.	"Alive" multivitamin	b.	Didn't think it was important.	n/a	n/a	a.	RPN for health coaching at [Kreger].	Yes	Yes	a.	Has wanted to try supplements would like to have more information.	e.	Because can trust MD & RPN	b.	Anything to do with vision or BP or possibility of death.	a., b., c., d., e., f., g.	Wants to be informed about adverse consequences to decide if I want to take the supplement.
6	M	40-49	Hispanic	Other	12th grade	Spanish		a.	multivitamin for men & gllucosamine	b.	Because doesn't need a prescription for these products.	n/a	n/a	b.	n/a	Would tell if asked.	Think it's important.	a.	Wants to know - be more informed.	c., f.	Because: more convenient.	a.	Wants to be informed.	a., b., c., d., e., f., g.	Can be serious consequences. Would want to be better informed. Did not know supplements would have serious interactions.
7	M	30-39	Hispanic	Other	Above 12th	English		a.	Ravage - workout & creatine	b.	Never thought I had to. I don't go to doctor very often.	n/a	n/a	b.	n/a	Yes. Sure.	Possibly	a.	Sure - I'd like to know possibilities.	a., b., c., d., e., f.	n/a	a.	You want to know what all possibilities are.	a., b., d., e., f., g.	c. Not circled because "pointless" d. e. & f. "Most important" g. "Sure"
8	F	30-39	Non-Hispanic	White	Above 12th	English		b.	n/a	b.	Does not use.	n/a	n/a	a.	"When I get a medicine refill or to see a doctor."	No - Does not use.	(blank)	a.	So if it had a bad reaction to it you could go after and see it. It wouldn't bother what you're taking right now.	a., b., c., d., e., f.	n/a	a.	"Because what if you experience a reaction you would want to know if it was because of the interaction."	a., b., c., d., e., f	a. "Because if they put [onit] for no apparent reason if you were taking other kinds of medication and it had that effect on you you would want to stop taking it" b. "Yes but I would not take it together. Or try something else" c. "Of course. If it caused health issues in your system from pills you were taking" d. "Because it would help to know when you were going to the doctor so they wouldn't g…
9	F	50-59	Non-Hispanic	White	Above 12th	English		a.	aspirin, tylenol, advil [mrl]	b.	I would if I was.	n/a	n/a	b.	n/a	Yes	I don't know.	a.	Make sure endangering my health - maybe I'm not supposed to be taking it.	a., b., c., d., e., f., g.	TV in waiting room.	a.	On TV when advertising medicine. Would like to know all possibilities because maybe won't take medicine at all.	a., b., c., d., e., f., g.	a. Concerning b. Ditto c. Because Dr. should [inform] d. Same answer e. You want to know that f. Same g. Yes & how many & such
10	F	70-79	Non-Hispanic	White	12th grade	English		b.	n/a	b.	Doesn't take.	n/a	n/a	b.	n/a	If asked I would let them know.	If asked should be taken into account.	b.	Have cancer - would make me nervous + depressed.	a., e., g.	g. To see if it would be helpful.	b.	Wants to know if it would hurt me.	b., c., d., e., f., g.	Wants to know to avoid bad things from happening.
11	F	21-29	Non-Hispanic	White	Above 12th	English		a.	multivitamin, vitamin D/Calcium, colostrum for colds, sickness that no px is available	a.	"I don't like to take […], so if I need to stay away from the {…} if I'm on them."	a., e.	e. "I did ask because I didn't want to be taking too much Vitamin D."	b.	n/a	Yes I would tell them.	"My new doctor, probably, my old doctor, no."	a.	"So I don't cause problems. I don't want to do damage by taking something."	c., d., e., f.	n/a	a.	"Because people have reactions differently so you would want to know if it was severe ia you -	a., b., c., d., e., f	a. "Because that would be dangerous." b. "Same as above. It would be dangerous. Also anticoagulants are really important so you need to know if there's a problem." c. "So I remember to inform my doctor." d. "So I could see my doctor, do it before it's dangerous". e. "So I could discontinue taking it". f. "Knowledge about the medications, if it made it stronger." g. "Other people's situation ma or…
12	M	70-79	Non-Hispanic	White	Above 12th	English		a.	multivitamin, C A E D, prostate complex, fish oil	a.	Yes, they asked.	d.	n/a	a.	They verbally ask me. My internist asks in a form at the beginning of a visit. They keep a reconciliation list and check each time.	Yes	Yes, though they have never indicated a problem with any of them. Interesting.	a.	Yes. Don't want to have it interfere with other meds.	a., b., d., e., f.	n/a	b.	Long list of drug information most is crap so I'd like to just hear about serious ones. Would like to hear if it interferes with another drug.	a, b, c, d, e, f	a. Might apply to me. b. Serious information/input good. c. [. . .] informed of all possible interactions. d. 'Does] have high blood pressure. f. Don't want to die from a stroke. f. Don't want uncontrolled bleeding or bruising.
13	M	80 +	Non-Hispanic	White	Above 12th	English		a.	*has a list: coQ10, niacin 1100 mg, bee pollen, aspirin, red yeast rice 1200 mg, magnesium 500 mg, folic acid 400 mg, Endoflex (glucosamine), vitamin C 1150 mg, vitamin B 5000 mg, calcium, B-complex 60 mg,	a.	He asked.	a., b., d.	n/a	b.	n/a	Sure	Yes	a.	I'm health conscious & at age 82 I have to be careful.	a., c., d., e., f.	Not print, but email yes.	a.	health conscious	a., b., c., d., e., f., g.	Health conscious - I don't want to do something that would be adverse to my health. e. Definitely.
14	M	50-59	Non-Hispanic	White	12th grade	English		b.	n/a	b.	n/a	c.	n/a	b.	n/a	If asked, yes would tell them.	The doctor would have to take it into account if there might be a problem, wouldn't they? Do they have to ask?	a.	Yes. That would better educate us about the stuff we're taking. You'd think he would know - but then they send you to a specialist. Money issues - concerned about being shuttled around to different doctors who only see you for a minute.	a., c., d., e., f.	n/a	a.	Plans ahead for different disease contingencies. Looks ahead. Feels doctors use patients as guinea pigs. One person died with treatment--get a second opinion. If you're considered a burden to the system, they don't care. Stays away from herbal medications because doesn't know what they'll do to him personally.	a., b., c., d., e., f., g.	Gaining more knowledge and information about different herbs--like St. John's Wort. Good to get a second opinion. Could be serious. Death!
15	F	60-69	Non-Hispanic	White	Above 12th	English		b.	n/a	(blank)	(blank)	(blank)	n/a	b.	n/a	Yes	I hope so! I think you should tell/take everything you can.	a.	Because it has an effect - chemistry in out body is important. People are from mixing medicines--they should know everything.	a., b., c., d., e., f.	b. Fabulous! g. Anything. Internet. Reminders in mail. Send someone over!	a.	Little sneaky ones are important. Can catch problems.	a., b., c., d., e., f., g.	Fabulous! She tried St. John's wort once. She would want to know- like to be informed. Especially like to be told things special for me. I don't ant to have a stroke. I would be really interested. Need to know all possible after-effects. Or, take to/share with my doctor. I am chemically sensitive.
16	F	70-79	Non-Hispanic	White	Above 12th	English		a.	vitamin C, vitamin E, vitamin D, alpha lipoic acid, + others	a.	They ask.	d., e.	e. When asked at every visit.	a.	Yes - OB/Gyn, when hospitalized in the ER.	Yes	I hope so.	a.	In case one is not aware of it.	e. g.	Because physician might not tell you.	a.	Safer if fully informed. Example: Friend had […] & not asked about allergies. ER: stitched up and it got infected & had to lance. Ideally have given […] […]	a., b., c., d., e., f., g.	Then can make an informed decision regarding risk vs. benefits.
17	M	60-69	Non-Hispanic	White	Above 12th	English		b.	n/a	b.	Does not use.	(blank)	n/a	b.	n/a	"Yes if they asked."	"I know the doctor I go to wouldn't."	a.	"To know about what I'm taking."	a., b., c., e., r.	e. "if they do a good one without too much written on it." g. written and verbal both.	a.	"So I know what I'm taking wrong."	a., b., c., d., e., f.	a. "I don't want to have that problem". b. "I don't want to not know what I'm taking, which is causing the problem." c. "I would get several doctors opinions." d. "Because that reaction could happen to me." e. "Because I don't want to die." f. Because I want my blood to keep flowing." g. "I might have the same problem they do."
18	F	21-29	Non-Hispanic	White	Above 12th	English		b.	n/a	b.	(blank)	(blank)	n/a	b.	n/a	Yes, to see what their opinion would be.	They would probably ignore it.	a.	If they give a prescription and something happens I would have to tell the doctor..	a., d., e., f., g.	g. via a housecall, either by phone or a visit.	a.	You want all information, every detail. If you don't get it all you get poor information.	a., b., c., d., e., f., g	a. Because on the news they talk about recalls on meds b. Dangerous c. Could cause damage d. High blood pressure--you might explode e. Good to know f. To know if it hurts your blood cells g. Good to hear both sides, both positive and negative
19	F	70-79	Non-Hispanic	White	Above 12th	English		a.	baby aspirin, curcumin, coQ10, horsetail, magnesium, vitamin D, bee pollen. Stopped caH 3 months ago.	b.	I don't know, I just haven't.	(blank)	n/a	b.	n/a	Yes	I really don't know if they would or not.	a.	Because I think it can be very dangerous - even though I haven't done anything about. I only have one Rx.	a., b., d., e., f.	f. mail/letter	a.	Because I know that this is possible and I've just ignored it. My husband decides what we should be taking.	a., b., c., d., e., f., g	a. It could be dangerous b. I want to be informed c. I would stop taking it. d. I would try to take care of it e. Definitely f. Yes, because you could have an accident g. I don't want to have a stroke - I would try to remedy the situation.
20	M	21-29	Non-Hispanic	White	12th grade	English		a.	one-a-day vitamin	b.	Didn't think it mattered.	(blank)	n/a	b.	n/a	Yes - if asked would tell.	No - it's just a vitamin.	a.	To know how it would affect me or others.	a., c.	a. Great information c. Why - smart phone easy to look at.	b.	If a [causes a] dangerous because it can lead to other problems like allergies.	a., b., c., d., e., f., g	To know how it could affect me or others. To know about the risk.
21	M	21-29	Non-Hispanic	White	Above 12th	English		a.	multivitamin, fish oil	b.	"They have never asked. I didn't think it was a big deal."	(blank)	n/a	b.	n/a	Yes	"No don't think so."	a.	"To see how it affects you."	a., b., c., f.	f. email	b.	"Just if it did something serious to me."	a., b., c., d., e., f	a. "So you know the dangers of it, the symptom if it happened." b. "Same reason." c. "So you know to tell your doctor." d. "So you know you're at a higher risk." e. "Yes because it would defeat the purpose of the other one." f. "I'm not much of a reader mostly, I wouldn't think it's much of a big deal."
22	F	30-39	Non-Hispanic	White	Above 12th	English		a.	prenatal multivitamin, vitamin C, wellness incentive (mix of vitamins and echinacea), and a separate echinacea	a.	Because they have asked.	d.	n/a	a.	Just on a form.	Yes	Yes	b.	It's just vitamins.	a., d., e., f.	f. email	a.	So I know if I need to stop one.	a., b., c., d., e.	(blank)
23	F	30-39	Non-Hispanic	White	Above 12th	English		a.	women's multivitamin	b.	Didn't think it was necessary.	(blank)	n/a	a.	Dentist, OB/GYN	Yes	Yes	a.	Never knew if there could be a counter-action against medication or other side-effects.	e.	e. Thinking about medication - that's their job. That's the point.	a.	Just to be [prepared].	a., b., c., d., e., f.	To know what can happen to make a better decision about taking [SVW].
24	F	40-49	Non-Hispanic	White	Above 12th	English		a.	multivitamin, minerals, omega 3, Collera, cranberry, flax seed. (Herbal Life too expensive).	a.	Because he asked. I don't wantanything to interact. I always tell.	e.	e. When I go to the doctor I tell them in person.	a.	Asked me why I was taking it.	Yes	I don't necessarily think that they do - they look at medicines I take.	a.	Because that would help me when I'm seeking healthcare so I can make decisions for myself - knowledge is powerful.	c., d., e., f., g.	Straight to my house.	a.	Because what's serious to me might not be to someone else. I want to know all possibilities.	a., b., c., d., e., g.	a. If it's frequent the likelihood is high. b. I want to know all - I could die c. Depends who the information is coming from. You would want to know who the information is coming from d. Helpful e. I want to know all risk factors f. No because it's not definite and a pharmacist should tell you g. I would like a link to the article. I want to make an informed decision.
25	M	50-59	Non-Hispanic	White	Above 12th	English		a.	*has a list: multivitamin, vitamin D, vitamin C, flax seed oil, Occuvite, Slo-Niacin, glucosamine, vitamin K (low dose).	a.	"I have a list of everything I take because it could interact with my Rx."	a., d.	n/a	a.	The VA wants to know everything you take.	Yes	Yes	a.	"Something could interfere. I would want to know so I could make achange if I needed to."	a., f.	n/a	a.	"So I can correct the problem. I don't want any interactions to experience."	a., b., c., d., e., f., g.	a. "I'm not wanting to die yet." b. "So I could quit taking the St. John's wort. c. "If it's causing a problem I wouldn't want to take it." d. "I want to have that knowledge for my case." e. "Because I don't want a stroke." f. "Because I want to know if the px isn't working." g. "I want to learn all I can. That would add to my knowledge."
26	F	60-69	Non-Hispanic	White	Above 12th	English		a.	probiotics, Donqua Herbal supplements, coQ10, damania, vitamins A, D, C, E, B supplement, senior multivitamin, magnesium, calcium, two Ds, amino acid, fish oil.	a.	Bring a list to a senior clinic. Because some may cause interactions. Split (up) calcium and magnesium to take at different times. Talk to doctor to find out which combinations to take.	d.	n/a	a.	Yes, at every annual visit at PCP. No one else cares.	Yes	Yes, if the doctor is enlightened.	a.	Because it could interfere. For example, calcium and thyroid medicine would stop the thyroid meds.	a., b., c., d., e., f., g.	g. Got an email about berry recall at Costco. Why couldn't medicine do that?	a.	Want to know if I could deparate them.	a., b., c., d., e., f., g.	a. Save yourself from an event. b. Save your life. c. Avoid harm d. (no comment) e. It's terrible f. Interfering with the effectiveness of the warfarin g. Should be on the news.
27	F	60-69	Non-Hispanic	White	12th grade	English		a.	multivitamin for 50 +, vitamin C, vitamin D, calcium, flax seed oil, glucosamine.	a.	Because they ask.	d.	n/a	a.	doctor	Yes	Yes, but they don't comment.	a.	Reassurance if [using].	f., g.	n/a	a.	To make sure decision about taking the supplement. More knowledge is better.	a., b., c., d., e., f., g.	Because I have high blood pressure and am taking medicine. Worries that supplement may interact with the high [blood pressure medicine].
28	M	50-59	Non-Hispanic	White	Above 12th	English		a.	multivitamin/multimineral, fish oil, vitamins A, E, C. Ginko biloba, milk thistle, cranberry extract.	a.	To see if there is anything that might be interacting.	a., d.	n/a	b.	n/a	If asked, yes.	Yes, I think they do.	a.	Well, what if I find out it's just a wast of moneybut cancelling out the effect of another medicine.	a., b., d., e., f.,	n/a	b.	Life-threatening; stuff that might cancel out the effects or make the effects worse of another medicine. For example, alcohol plus a medicine can make it worse. Wants to hear, "Do not take A with B…"	a., b., c., d., e., f., g.	A lot of these vitamins and supplements on the label it says FDA does not approve. I would like to see the FDA invest more $ in research and development. Plus, quality control. Also, the levels of ingredients may be falsely represented on labels--you may not get that ingredient in the proper or adequate dose to be effective.
29	F	50-59	Non-Hispanic	White	Above 12th	English		a.	Herbs - suma, herbal vitamin, nerve herbal combo [Dr. Christopher's], calcium.	a.	She asked.	d., g., e.	e. Told her in person.	a.	paper/Rx prompter--[doctor's] form.	Yes - sometimes I have been hesitant because past experiences I found they didn't care or why would you take that. Sometimes I feel reserved about telling. Medicines are derived from herbal agents.	Some doctors do.	a.	Yes/no. I would want to know if there was a possible conflict with over the counter medicines (not herbs). I always seek alternative medicines instead of Rx's. Chiropractor or herbs. I avoid traditional medicine.	a., b., c., d., e., g.	b. Interesting e. The more information the better. g. Prefer face-to-face	a.	Any type of symptoms to be aware of I would want to know. Smaller symptoms can lead to bigger problems.	a., b., c., d., e., f., g.	a. So I am aware & would hope if I was having a symptom b. (Same as previous answer) c. I guess - to find out more information d. For sure - preventative information is good to avoid problems e. I would want any information about my body & things to checkout or do differently f. (no comment) g. If you know it really has happened - it is helpful to know that everybody's body acts differently.
30	F	50-59	Non-Hispanic	White	Above 12th	English		a.	vitamin D, vitamin B, sometimes vitamin E & C. Sometimes wellness formula from health food store.	a.	Tell them just to avoid problems and make sure there won't be any infections.	d.	n/a	a.	At the doctor visit. Can't think of an example.	Yes. Feels comfortable telling, definitely.	Yes	a.	Yes I would rather the pharmacist tell her because she doesn't usually read through the paper they gibe her.	a., b., c., d., e., f.	n/a	a.	It would be nice to know what to expect.	a., b., c., d., e., f., g.	Some doctors accept it and care more. Some think you should just stick with the prescriptions. I would like to have the option to use alternative medicines from my doctor.
31	M	40-49	Non-Hispanic	White	Above 12th	English		a.	fish oil, B12 complex, colon cleanse, vitamin D, vitamin C, [multivitamin].	b.	No - didn't think it was relevant.	(blank)	n/a	a.	When asked about other medicines.	Yes	(blank)	a.	To be safe.	c., d., e., f.	n/a	a.	Smart thing - for educational purpose.	a., b., c., d., e., f., g.	Being proactive about our health.
32	F	30-39	Hispanic	White	Above 12th	English		a.	fish oil, omega-3, colon cleanse detox, cranberry, vitamin C, calcium, apple cider vinegar.	b.	Wasn't asked.	(blank)	n/a	a.	When {being prescribed] a medicine.	Yes	(blank)	a.	To prevent interactions.	b., c., e., f.	n/a	b.	[Could prevent] permanent damage.	a., b., d., e., f., g.	To be educated about self and family health.
33	F	40-49	Non-Hispanic	Black	Above 12th	English		a.	vitamin D, multivitamins, vitamin C, probiotic, laxative.	b.	I do not have a primary care physician and they have never asked. I never get sick and if I do I just double down on my supplements.	n/a	n/a	b.	No	Yes	II really have not been sick.	a.	I do not want to take something that will make the medication ineffective. This will increase costs of treatment. I also want to know my negative effects. I do not want to die from the medication interactions.	a., d., e., g.	g. Every year at work we get lab draws and physicals. This would be a good time to also receive this information. E.g., Fit Program.	a.	When you say that I see a scale, e.g., yellow, green, red. I want to see a scale/grading scale of severity so I can get an idea of what I am dealing with.	e.	It tells me what will happen. Based on those words I can get a picture in my mind of what will happen. I understand the word, "stroke" - that gives me a picture of what will happen. Then I can weigh the risk.
34	F	50-59	Non-Hispanic	Black	Above 12th	English		a.	Lactose digestive aid, vitamin D, probiotic, vegi protein powder, multivitamin, omega-3, baby aspirin.	a.	Because I am a medical professional and I know it's important. [Person is a medical professional at another institution. -CC].	d.	n/a	a.	Yes, when I started to bruise this year when I was taking omega-3 and baby aspirin.	Yes	Yes, because the bruising episode the doctor thought about it before I did.	a.	Never hurts to know.	a., c., f.	f. email letting me know there is new information.	a.	Have the interactions classified as minor or serious.	c., d., f.	I want to know why, don't just scare me. And what the possible interactions and severity are.
35	M	50-59	Non-Hispanic	Black	Above 12th	English		a.	multivitamin, chondroitan [sulfate], creatine.	a.	I make them aware because I have prescription medicines.	a., d., e.	e. When I have a new doctor.	b.	n/a	Yes	I think probably not. I would hope so, but I doubt it.	b.	I would like to believe that if I have already tried the doctor he would let me know.	a., c., e., f.	f. email	a.	Because I want to know about my health so I can make a good decision.	b., c., d., e., f.	I want to know the serious implications of taking the supplements.
36	F	30-39	Non-Hispanic	Black	Above 12rh	English		a.	probiotic (digestive enzymes)	a.	Sometimes, but I do not list it on my forms of medications. I tell them, depending on how I feel, if it is pertinent to my treatment. For example, if I am talking about having cramps I tell them about my digestive enzymes.	c.	n/a	b.	No. They don't care. They want to know prescriptions. Even if they are writing a prescription, they never ask. It never matters.	Yes. I would have no problem telling them.	Absolutely not. I don't think they care.	a.	For knowledge and awareness for myself so I can ask better questions to my primary care provider. I feel like my primary care provider is not informed about interactions, so I need to know so I can ask them better questions and be aware. For example, I was having reactions from one of my medication s and my primary care provider did not know that the ingredients [hormones] (progesterone) was maki…	c.	n/a	a.	I would like to determine my self what I am willing to endure. How it can benefit me, especially when I receive a prescription. I ant to weigh the risks.	b., c., d., e., f.	They seem more descriptive and applicable to me. The others do not bring it home to me. (D) would be the best, because it talks specifically about my issue. It is more personal, or rather personalized. It would be cool if the smart phone application would allow me to enter the medications and supplements I am taking, be able to save them, search for interactions and even put in my symptoms.
37	M	21-29	Non-Hispanic	Black	Above 12th	English		a.	multivitamin, omega-3, probiotic, magnesium, vitamin D.	a.	My wife told me to. I never would have thought about telling them before.	d.	n/a	a.	Every visit my doctor always asks, "Are you still taking …" and she names off what's in the system (my record).	Yes	I assume they do.	a.	I would like to know that even if it's missed by the doctor or pharmacy I would still get the information and bring it to someone's attention. Fail-safe type thing.	a., c., d., f.	n/a	a.	It just makes sense. The more knowledge you have the better care you will receive.	d., e.	a. What interactions, I would like to know b. What interactions? c. I like the recommendation, but would like the consideration to come from a doctor and not a website/app d. (no coment) e. (no comment) f. I do not want a technical message. I may see this as a bad thing g. People write articles all the time. This is more confusing than helpful. Just telling me that you will have an interaction do…
38	F	30-39	Non-Hispanic	White	Above 12th	English		a.	vitamin D and probiotic.	a.	Works in medical field and avoids doctors. Yes, definitely more into alternative medicines.	e.	Once per year, to fill prescription (for thyroid).	a.	Nurse does when she takes my health history. They don't really care.	Yes	No. Doesn't think they care - seems like a form question. Doesn't think patients feel comfortable in general revealing that kind of information to the doctor.	a.	Yes. More into that.	a., d., f.	n/a	b.	Would like to hear about things like, "inability to urinate," life/death scenerios too. Mild iritations don't effect daily life.	c., d.	Wants to know the odds. Always a downside to something. People are busy/overwhelmed. Want to cut to the chase. Direct information.
39	F	50-59	Hispanic	Other	Above 12th	English		a.	Uses "processes" - thought processes called, "access consciousness bars". There are 32 points on your head that release negative beliefs. Also body processes.	a.	Yes, because she could see the change in me and I wanted to share. Everything turned around. I was going to do chemotherapy and have lymph nodes removed. The body has its own consciousness and healing.	a., b., c., d.	n/a	b.	No	Yes	Yes	a.	Yes I would wnt to know what the doctor thought. To get another perspective. Doesn't want to limit self. Has seen miracles happen.	a., b.d., f.	n/a	a.	The more information the better. You can decide for yourself.	a., b., c., d., e., f., g.	Doctor should listen more to patient about what is working for them. Bad tooth almost fatal--doctor dismissed it. Some therapies are helpful (Access Concsiousness).
40	F	50-59	Non-Hispanic	Other	12th grade	English		b.	Equates a lot of the good to God. We each have a choice.	a.	Yes because I didn't want to take the anti-depressant they wanted to prescribe. I know my body.	a., c., d.	n/a	a.	Yes; a psychiatrist a long time ago.	Yes	Yes	a.	Yes, absolutely. Every drug has a side effect. Prayers don't.	a., b., c., d., e., f., g.	g. Gets them from drug.com (drug recalls).	a.	Could save her life.	a., b., c., d., e., f., g.	Doctors should not act like God or something. They should listen to patients and take their advice on what works for their bodies. Depression is one of the emotions. Doctors don't want you to have emotions; just prescribe a pill. Let us have our emotions.
41	F	50-59	Hispanic	Other	12th grade	Spanish		a.	vitamin D, vitamin B-12.	a.	Yes, she (doctor) is aware of the vitamin D. Hasn't told her about vitamin B yet.	d., e.	e. When visiting.	a.	Yes. No example.	Yes	Yes, I think they do. She is the one who told her to take vitamin D.	a.	Yes, definitely. For our health, we need to know. Lables should clearly tell what chemicals are in them. Very important.	a., b. d., f.	c. Not something you can count on.	a.	That way she can figure out what's going on.	a., b., c., d., e., f., g.	Over-the-counter medicines have labels (NOT FDA approved), yet she sees millions of people buying those. Doesn't understand that. Hasn't been investigated, but still widely used. Wants clearer labels. Doesn't know exactly what the [alternative medicines] are for. A dietician could be wasteful if you're eating right. The contradictions on the vitamin labels are confusing.
42	F	40-49	Hispanic	Other	Above 12th	Spanish		a.	vitamin B-12	b.	No comment.	a.	na/	a.	Every year at pap exam the doctor asks, "What are you taking - any other medications, any herbs…"	Yes	Yes	a.	Yes - we need to be informed. Medicines may have secondary effects. Even with prescriptions, we need to know.	a., b., d., e., f.	f. Print, not email.	a.	All of the above.	a., b., c., d., e., f., g.	Good thing for everyody. Need to be conscious. For patients who don't have insurance, expensive doctor appointments. People treat themselves and it could be dangerous for our system. Good information for everybody to know.
43	F	30-39	Non-Hispanic	Black	Above 12th	Kiswahili		a.	omega-3, vitamin E, vitamin D, flax seed bacopa, prenatal vitamins, iron.	a.	For health benefits.	d., e.	e. When wanted to be on natural supplements.	b.	No	Yes	I think so. It is always good for them to know what else you are taking before recommending anything else.	a.	It's a good precautionary step and also so I can understand what information is out there.	a., c., e., f.	n/a	a.	Also include the symptoms. I think interactions are individualized. So one person's reaction may be different so you want to now what you are at risk for so you can manage your condition.	c., e., f.	d. This message is scary and will increase distress. You have to be careful with how you communicate this information. I would rather see (C) instead of (D). You do not want to be too vague or too generalized and you do not want it to be too specific because most likely they have not factored all the information your doctor has. But you want people to act on the message you are sending them.
44	F		Non-Hispanic	Black	Above 12th	English		a.	Tylenol, Advil.	b.	I guess I just never saw it as important.	n/a	n/a	b.	I do not recall them ever asking me. They ask me if I am on any medications butnever supplements or alternative medicines.	Yes, I would if (they) did.	Does not apply. Never asked by doctor.	a.	I want to know if something is interfering with what I am taking and any problems.	a., f.	n/a	b.	Because I think if you get all you can get caught up in all the information and be afraid to take your medication.	a., b., c., d., e., f., g.	If I am taking a medication I want to be well-informed and would like to know that all these reactions would happen to me.
45	F	50-59	Non-Hispanic	American Indian	12th grade	English		a.	multivitamin and calcium	a.	Because they ask if [she is] taking any medications or anything.	d., e.	e. Just when she feels like it.	a.	That's their job. They have to ask. Even if they don't ask, I tell. That way they will know what drug to give and what to take with vitamins, etc.	Yes. I have to be aware of what you can take with milk, etc. Want to be informed.	Yes	a.	Learn new things about medicine and how your body reacts/changes with illness. If it works, it works.	a., c., d., e., f.	n/a	a.	Will know ahead of time what's going on. To be aware and be able to tell others if they're taking the same thing. To inform friends based on my experience. Thinks there is a placedbo effect--if people eat right, quit drinking and smoking, they will be well. If you're not really sick you don't have to take anything.	a., b., c., d., e., f., g.	Have doctors checking up on how the medication is working. Working or not? If not, whether we need a different medication. Don't need to take it all the time. Doctors don't ask.
46	M	60-69	Non-Hispanic	American Indian	Above 12th	English		a.	multivitamin, iron, whey protein. Takes vitmins to supplement diet	a.	Diabetic and has anemia. Want to inform them because of conditions.	a., c., d.	n/a	a.	Yes, after they did his lab tests/results. They see what he's taking.	Yes. He feels they need to learn about it. If you take too much of this/that….can't take vitamin C (like OJ) with whey protien--don't want to turn into a juicy experiment! He wants the doctor to be informed.	Yes because they seem to be knowledgeable about side effects.	a.	Would probably have more information.	a., d., e., f.	n/a	a.	To avoid misinformation. Who wants to take 15 pills a day?	a., b., c., d., e., f., g.	No comment.
47	M	21-29	Hispanic	Other	Above 12th	Spanish		a.	Life Research products which boost immunity, energy drinks, vitamins for men.	b.	Not many check-ups, with dermatologist, etc. It never comes up.	a., c.	n/a	a.	Went to see dermatologist. Had two moles removed. One of the doctors asked if I was taking any dietary supplements.	Yes	No	a.	Dietary supplements aren't approved by the FDA. You take them based on their intended uses, but you don't really know what reaction you could have by mixing it with other medicines or treatments.	a., b., c., e.	a. Directly from doctor is best. More secure information is right.	a.	Very into knowing what could happen to him. Wants to know about all so he can be the ultimate decision-maker.	a., b., c., d., e., f.	Information is interesting but input on the reception/presenetation end is most vital. Reputable/credible sources are important. If he gets a random email he would probably ignore it.
48	F	60-69	Non-Hispanic	White	Above 12th	English		a.	green tea, calcium with vitamin D, multivitami, vitamin B-3, B-12.	a.	Yes, at the VA they have a questionnaire where they require the information.	d.	n/a	a.	Yes - rheumatology has prescribed a special medication that requires he take calcium with vitamin D.	Yes. Has also participated in a double-blind study. Wants to help people. Wants to alleviate human suffering; chronic pain.	Yes	a.	To be informed is enlightened.	b., c., d., e., f., g.	Prefers redundancy. If one method fails another may succeed.	a.	To be capable of deciding reactions.	a., b., c., d., e., f., g.	The glory of God is intelligence. Bible says that with all thy getting, get understanding. Religiously or intellectually, better to be informed than uninformed. Consequences/repercussions may be reduced by the information.
49	M	60-69	Non-Hispanic	White	Above 12th	English		a.	vitamin E, vitamin D, shampoo, face cleaner.	a.	Because they want to see if it will go wrong with other medicine I take.	a., d.	n/a	b.	n/a	Yes	Yes	b.	n/a	a., d., e.	n/a	a.	No comment.	None	Taking St. John's wort may have contributed to her nervous breakdown. She takes prozac for depression.
50	F	30-39	Non-Hispanic	White	Above 12th	English		a.	herbal teas for ph balance (alkaline), "Telemer" multivitamin/mineral drink.	b.	Not all of them.	a.	n/a	b.	n/a	Yes	I think so.	a.	To avoid any negative side effects or interactions.	a., c., d., e., f.	n/a	b.	Wants to know about anything life-threatening or anything that may cause damage to the organs.	a., b., c., d., e., f.	When the doctor prescribes something and there may be a serious adverse effect, it would be good for them to warn the patient directly up-front. They don't do that with herbal medicines at all.
																								* a. Taking St. John’s wort with warfarin frequently results in an interaction. b. Taking St. John's wort with warfarin can cause a serious reaction. c. We strongly recommend that you inform your doctor and consider not taking St. John's wort. d. You are at greater risk because you have high blood pressure and have experienced an episode of bleeding. e. Taking St. John's wort with warfarin can ca…
